# Supplementary material
Source: ML conference proceedings conference paper supplement (https://openaccess.thecvf.com/content/CVPR2026/html/Fang_TaskIT_Memory-Efficient_Fine-Tuning_CVPR_2026_paper.html)
Supplement: Supplementary file 1 [file Fang_TaskIT_Memory-Efficient_Fine-Tuning_CVPR_2026_supplemental.pdf]

## 1 A. Additional Technical Details

### 2 A.1. Summary of Notations

3 Tab. 1 summarizes the major notations.

### 4 A.2. Estimation of $M_w(s)$

5 This section provides the details for estimating  $M_w(s)$  in §  
6 4.3.1.  $M_w(s)$  captures the memory overhead introduced by  
7 all LoRA modules selected under strategy  $s$ , including their  
8 parameters, gradients, and optimizer states. Let  $M_{param}(s)$   
9 be the total parameter memory of the inserted modules.  
10 Gradients require the same amount of memory as parameters.  
11 The optimizer state size depends on the optimizer.  
12 For example, AdamW maintains two moment estimates per  
13 parameter, resulting in an additional  $2 \times M_{param}(s)$  mem-  
14 ory cost [31]. Therefore, for AdamW, the total module-  
15 related memory is  $M_w(s) = 4 \cdot M_{param}(s)$ , where the  
16 factor 4 accounts for parameters, gradients, and two sets  
17 of moment estimates. In general,  $M_w(s)$  scales linearly  
18 with  $M_{param}(s)$  and can be computed directly once the op-  
19 timizer is specified.

### 20 A.3. Complete Intra-Block Dependencies for $g_x(k)$

21 This section explains how to configure  $g_x(k)$  for the remain-  
22 ing five intra-block dependencies in § 4.3.2.

23 **Inserting a module  $w_k$  at  $W_k$  (Fig. 5a).** The forward  
24 pass is  $K = x_{in}(W_k + w_k)$ . To compute  $\nabla_{w_k} L$ , gradi-  
25 ents flow from  $\nabla_{\text{Attn}(Q,K,V)} L$  to  $\nabla_K L$  via the attention  
26 operator. Since  $\text{Attn}(Q, K, V) = \text{Softmax}(\frac{QK^T}{\sqrt{d}})V$ , the  
27 dependency between  $K$  and the output involves the inter-  
28 action with  $Q$  and  $V$ . Therefore, computing  $\nabla_K L$  requires  
29 the stored activations  $Q$  and  $V$ . Finally,  $\nabla_{w_k} L$  needs the  
30 input activation  $x_{in}$ . Thus, insertion location at  $W_k$  requires  
31 storing  $Q$ ,  $V$ , and  $x_{in}$ .

32 **Inserting a module  $w_v$  at  $W_v$  (Fig. 5b).** The forward  
33 pass is  $V = x_{in}(W_v + w_v)$ . To compute  $\nabla_{w_v} L$ , gradi-  
34 ents flow to  $\nabla_V L$  through the attention operator. In the  
35 term  $\text{Attn}(Q, K, V) = \text{Softmax}(\frac{QK^T}{\sqrt{d}})V$ , the variable  $V$   
36 is multiplied by the attention weights (the result of Soft-  
37 max). Consequently, the backward pass to  $V$  requires the  
38 reconstruction of these attention weights, which depends on  
39 the stored activations  $Q$  and  $K$ . Calculating  $\nabla_{w_v} L$  further  
40 requires the input  $x_{in}$ . Thus, insertion location at  $W_v$  re-  
41 quires storing  $Q$ ,  $K$ , and  $x_{in}$ .

42 **Inserting a module  $w_o$  at  $W_o$  (Fig. 5c).** The forward pass  
43 is  $x_{out}^1 = (W_o + w_o) \cdot \text{Attn}(Q, K, V) + x_{in}$ . To compute  
44  $\nabla_{w_o} L$ , gradients flow directly from  $\nabla_{x_{out}^1} L$ . The local gra-  
45 dient computation for the weight  $w_o$  requires the input to  
46 the linear projection, which is the output of the attention  
47 mechanism,  $\text{Attn}(Q, K, V)$ . Thus, insertion location at  $W_o$   
48 requires storing the activation vector  $\text{Attn}(Q, K, V)$ .

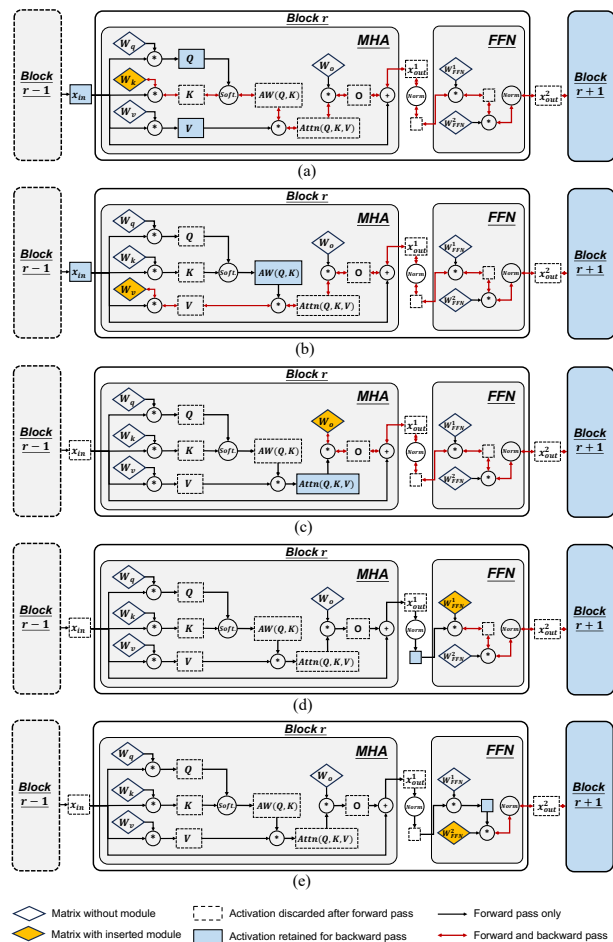

Figure 1. Intra-block activation dependency analysis. (a)-(e) demonstrate the activation preservations when inserting modules into  $W_k$ ,  $W_v$ ,  $W_o$ ,  $W_{FFN}^1$ , and  $W_{FFN}^2$  matrices, respectively.

49 **Inserting a module  $w_{FFN}^1$  at  $W_{FFN}^1$  (Fig. 5d).** Let the  
50 FFN be defined as  $FFN(x) = W_{FFN}^2 \cdot \psi((W_{FFN}^1 + w_{FFN}^1) \cdot$   
51  $\text{Norm}(x))$ , where  $\psi$  is the activation function like ReLU. To  
52 compute  $\nabla_{w_{FFN}^1} L$ , the backpropagation process requires the  
53 input to this specific layer. The input to  $W_{FFN}^1$  is the normal-  
54 ized output of the attention block, denoted as  $\text{Norm}(x_{out}^1)$ .  
55 Thus, insertion at  $W_{FFN}^1$  requires storing  $\text{Norm}(x_{out}^1)$ .

56 **Inserting a module  $w_{FFN}^2$  at  $W_{FFN}^2$  (Fig. 5e).** The forward  
57 pass involves  $x_{out}^2 = (W_{FFN}^2 + w_{FFN}^2) \cdot v + x_{out}^1$ , where  $v =$   
58  $\psi(W_{FFN}^1 \cdot \text{Norm}(x_{out}^1))$  is the intermediate activation of the  
59 feed-forward network. To compute  $\nabla_{w_{FFN}^2} L$ , the gradient  
60 computation requires the input to the second linear layer,  
61 which is the intermediate hidden state  $v$ . Thus, insertion at  
62  $W_{FFN}^2$  requires storing the intermediate FFN activation  $v$ .

### A.4. Pseudocode for DP-based Scheduler

Algorithm 1 illustrates the workflow of the module inser-  
tion scheduler. The DP state space is  $O(|\mathcal{K}| \cdot U)$ . Com-

| Notation                                   | Definition                                                                          |
|--------------------------------------------|-------------------------------------------------------------------------------------|
| $t_1, \dots, t_n$                          | Previously learned tasks                                                            |
| $t_{n+1}$                                  | New task to be fine-tuned                                                           |
| $d$                                        | Batched input data of the new task                                                  |
| $\theta$                                   | Frozen pre-trained backbone parameters                                              |
| $\mathcal{K}$                              | Set of projection matrices, i.e. candidate LoRA module insertion locations          |
| $W_k$                                      | Frozen projection matrix at backbone location $k \in \mathcal{K}$                   |
| $w_i^k$                                    | LoRA module parameters for task $t_i$ at location $k$                               |
| $\mathbf{s}$                               | Module insertion strategy (vector where $s^k$ is the rank at location $k$ )         |
| $M_B$                                      | Total memory budget for LoRA fine-tuning                                            |
| $\lambda_{n+1}$                            | Predicted module importance vector for new task $t_{n+1}$                           |
| $\lambda_{n+1}^k$                          | Importance of module at location $k$ for new task $t_{n+1}$                         |
| $\lambda_i^k$                              | Importance of module at location $k$ for learned task $t_i$                         |
| $\phi(t_{n+1}, t_i)$                       | Task similarity between new task $t_{n+1}$ and learned task $t_i$                   |
| $x(w_i^k; d)$                              | Output activations of LoRA module $w_i^k$ on data $d$                               |
| $x(W_k; d)$                                | Output activations of frozen matrix $W_k$ on data $d$                               |
| $x(\theta + \mathbf{w}_i; d)$              | Output activations of the backbone $\theta$ merged with task modules $\mathbf{w}_i$ |
| $x^*(\theta + \mathbf{w}_{n+1}; d)$        | Approximated activation of the new task                                             |
| $M(\mathbf{s})$                            | Peak fine-tuning memory usage under strategy $\mathbf{s}$                           |
| $M_{con}$                                  | Constant memory usage (frozen backbone parameters and runtime overhead)             |
| $M_w(\mathbf{s})$                          | Memory usage of LoRA modules (parameters, gradients, optimizer states)              |
| $M_x(\mathbf{s})$                          | Memory usage of cached activations during backpropagation                           |
| $\mathbf{g}_x(\mathbf{s})$                 | Binary mask indicating activations to be retained for strategy $\mathbf{s}$         |
| $\mathbf{m}_x$                             | Memory size vector of candidate activations                                         |
| $W_q, W_k, W_v, W_o, W_{FFN}^1, W_{FFN}^2$ | Frozen projection matrices in backbone                                              |
| $r$                                        | Rank size of an inserted module                                                     |
| $Q, K, V$                                  | Query, Key, and Value matrices in attention blocks                                  |
| $P[k][M_b]$                                | Maximum cumulative importance at location $k$ with memory cost $\leq M_b$           |
| $k_s$                                      | Index of the nearest previously inserted module location (predecessor)              |
| $\Delta M$                                 | Incremental memory cost of inserting a module given predecessor $k_s$               |
| $\mathcal{R}$                              | Set of candidate LoRA ranks                                                         |
| $h(r)$                                     | Rank-based importance scaling function                                              |
| $U$                                        | Number of memory discretization bins                                                |

Table 1. Summary of major notations.

66 putting each state  $P[k][M_b]$  involves iterating over all ranks  
67  $r$  ( $O(|\mathcal{R}|)$ ) and preceding locations  $k_s$  ( $O(|\mathcal{K}|)$ ). Thus, the  
68 overall time complexity is  $O(|\mathcal{K}|^2 \cdot |\mathcal{R}| \cdot U)$ .

## 69 B. Additional Experimental Setups

### 70 B.1. Details of Baselines

71 The configurations of the baselines are as follows.

#### 72 B.1.1. Zero-FT

- 73 • Prompt Tuning [14] adds prompt vectors to the keys and
- 74 values of the attention module in each transformer block.
- 75 We adopt a deep prompt tuning approach, incorporating
- 76 16 learnable prompt vectors per block into the first 24
- 77 blocks of the backbone following [20].
- 78 • AdapterSoup [3] averages the weight space of pre-trained
- 79 domain adapters, selected via textual clustering or simi-
- 80 larity, to enhance generalization to new domains.
- 81 • AdapterFusion [22] introduces a fusion layer with an at-

tention mechanism to combine multiple pre-trained task  
adapters. We implement the fusion layer with a reduction  
factor of 16, balancing parameters and performance.  
• LoraHub [11] applies a gradient-free evolutionary strat-  
egy to learn scalar weights for combining LoRA modules.  
We set the LoRA rank to  $r = 8$  and randomly select 20  
candidate modules for composition.

#### B.1.2. Non-LoRA-based PEFT

- Full tuning [12] updates all parameters of the pre-trained  
backbone and classification head.
- Linear tuning [12] freezes the pre-trained backbone and  
only updates the parameters of the final linear classifica-  
tion head.
- BitFit [28] optimizes the bias terms within all linear lay-  
ers of each transformer block. We apply this optimization  
to every bias term throughout the network, following the  
approach outlined in the original implementation.
- RS-Bypass [13] creates an independent bypass network

---

**Algorithm 1** DP-based Module Insertion Scheduler

---

**Require:** Memory budget  $M_B$ , Module importance scores  $\lambda_{n+1}^k$ , Memory prediction function  $M(s)$ , Rank set  $\mathcal{R} = \{0, 2^0, \dots, 2^6\}$ .

```
1: Initialize DP table  $P[k][M_b] \leftarrow -\infty$  for all  $k$  and  $M_b$ 
2: Set  $P[0][M_b] \leftarrow 0$  for all  $M_b$ 
3: Set  $U \leftarrow 500$ 
4: Set  $\mathcal{R} \leftarrow [0, 1, 2, 4, 8, 16, 32, 64]$ 
5: Set the step size for memory bins  $\Delta M_b = \frac{M_B}{U}$ 
6: for  $k = 1$  to  $|\mathcal{K}|$  do
7:   for  $M_b = 0$  to  $M_B$  with step  $\Delta M_b$  do
8:     Initialize  $P[k][M_b] \leftarrow P[k-1][M_b]$  {Start with
       the value from the previous state (no insertion)}
9:     for  $r \in \mathcal{R}, r > 0$  do
10:      for  $k_s = 0$  to  $k-1$  do
11:         $\Delta M \leftarrow M(s_k) - M(s_{k_s})$ 
12:        if  $P[k_s][M_b - \Delta M] > -\infty$  then
13:           $imp \leftarrow P[k_s][M_b - \Delta M] + h(r)\lambda_{n+1}^k$ 
           {Calculate the new importance if inserting
           rank  $r$ }
14:          if  $imp > P[k][M_b]$  then
15:             $P[k][M_b] \leftarrow imp$ 
16:          end if
17:        end if
18:      end for
19:    end for
20:  end for
21: end for
22:  $s \leftarrow \max_{0 \leq k \leq |\mathcal{K}|} P[k][M_B]$ 
23: Backtrack to find optimal module insertion strategy
24: return  $s$ 
```

---

100 using detached Res-Tuners to avoid backpropagation  
101 through the pre-trained backbone, reducing memory use-  
102 age. We use a learnable fusion parameter initialized at  
103 0.5, with other settings consistent with RS.  
104 • Adapter [9] inserts adapters between transformer layers,  
105 consisting of a down-projection, followed by a nonlinear  
106 activation, and an up-projection. We set the bottleneck  
107 dimension  $r = 128$ .  
108 • AdaptFormer [2] introduces a lightweight bottleneck  
109 module (AdaptMLP) alongside the frozen MLP block,  
110 consisting of down-projection and up-projection layers.  
111 We set the bottleneck middle dimension to  $\hat{d} = 64$  and  
112 the scaling factor to  $s = 0.1$ .  
113 • FacT-TK [15] tensorizes transformer weights into a  
114 3D tensor and decomposes the weight increments into  
115 lightweight factors for efficient tuning. We typically use  
116 a rank of  $r = 8$  for the decomposition factors.  
117 • RS [13] separates parameter-efficient tuners from the  
118 backbone, treating them as residual modules added to  
119 frozen operations, allowing flexible combinations of

adapters, prefixes, and prompts. We set the prompt/prefix  
length and adapter middle dimension to 10. 120 121

- ConvPass [14] inserts trainable convolutional bypass  
modules ( $1 \times 1$ ,  $3 \times 3$ ,  $1 \times 1$ ) in parallel to the atten-  
tion and MLP blocks to introduce visual inductive bias. 122 123 124  
We set the bottleneck dimension to  $h = 8$  for the convo-  
lutional layers. 125 126
- LISA [21] uses layerwise importance sampling to freeze  
most layers during optimization, updating only the em-  
bedding, head, and a few random intermediate layers. We 127 128  
configure the strategy to update the embedding layer, the  
head, and 2 random intermediate layers (E+H+2L). 129 130 131
- LoSA [20] adapts transformers by adding low-rank mixer  
blocks in parallel to the frozen backbone to efficiently  
process features. We set the low-rank adaptation rank to  
 $r = 8$ . 132 133 134 135
- HST [18] attaches a lightweight Hierarchical Side Net-  
work (HSN) to the frozen backbone to extract multi-  
scale features and uses a Meta-Register token to aggre-  
gate global information. We use a single trainable token  
for the Meta-Register and align the HSN stages with the  
backbone. 136 137 138 139 140 141
- UniPT [5] supports transfer learning via a parallel net-  
work with an interaction module for processing interme-  
diate activations and a confidence aggregation module for  
cross-layer feature integration. We adopt a reduction fac-  
tor of 4 for the parallel network dimensions. 142 143 144 145 146

### B.1.3. LoRA-based PEFT 147

- LoRA [10] decomposes the weight matrices into trainable  
low-rank parameters to efficiently approximate weight  
updates. In our approach, we apply this adaptation to  
all linear projections in the transformer block (includ-  
ing query, key, value, output, and MLP), using a rank of  
 $r = 8$ . 148 149 150 151 152 153
- NOAH [32] treats Adapter, LoRA, and VPT as modular  
prompts and uses a one-shot neural architecture search to  
find the optimal module design and hyperparameters for  
each transformer block. We train the supernet for 500  
epochs and perform the evolutionary search for 5 epochs. 154 155 156 157 158
- $\pi$ -Adapter [26] uses Fisher Information Matrix embed-  
dings to identify similar tasks and interpolates parameters  
from pre-trained lightweight experts for task adaptation.  
We use  $k = 2$  auxiliary experts for interpolation and op-  
timize the interpolation weights along with the target ex-  
pert parameters. 159 160 161 162 163 164
- AdaLoRA [30] applies singular value decomposition to  
parameterize incremental updates and dynamically allo-  
cates the parameter budget by pruning singular values  
based on importance scores. We use a cubic schedule to  
prune the rank from an initial value to the target budget,  
with orthogonal regularization  $\gamma = 0.1$ . 165 166 167 168 169 170
- AutoLoRA [31] uses a meta-learning framework to de-  
termine layer-specific optimal ranks by learning selection 171 172

173 variables for decomposed rank-1 matrices. The selection  
 174 variables start at a dimension of 8, with an alternating op-  
 175 timization strategy for updating model weights and selec-  
 176 tion variables.

## 177 B.2. Other Experimental Setups

178 **Implementation Details.** All experiments are conducted  
 179 on  $8 \times$  NVIDIA GeForce RTX 3090 GPUs. Unless other-  
 180 wise specified, we use the default configurations of the pre-  
 181 trained foundation models, including the AdamW optimizer  
 182 and an input resolution of  $224 \times 224$  following [20, 26, 31].  
 183 When  $w_k^i$  is unavailable for a task in Eq. (3), we set  $\lambda_k^i = 0$ .  
 184 Intuitively, if task  $t_i$  already performs well without a mod-  
 185 ule at location  $k$ , then a similar new task is unlikely to re-  
 186 quire one there either.

187 **Settings for Vision-Language Tasks.** We strictly follow  
 188 standard evaluation protocols for all VL tasks [26]. We re-  
 189 port the standard accuracy metric (ACC@0.5) on valida-  
 190 tion and test splits. The training configuration includes 100  
 191 epochs, a dropout rate of 0.1, a warmup ratio of 0.06, a  
 192 learning rate of  $1e-4$ , a batch size of 4, and a label smooth-  
 193 ing factor of 0.1. For LoRA-based adaptation with fixed  
 194 ranks, we set a default rank of  $r = 8$ .

195 **Settings for Vision Tasks.** For image classification, we  
 196 train for 200 epochs with a batch size of 4 and a learning  
 197 rate of  $1e-4$ . A label smoothing ratio of 0.1 is applied.  
 198 Regarding data augmentation, we follow the protocols es-  
 199 tablished in prior work [26], incorporating random resize  
 200 cropping, random horizontal flipping, RandAug, and ran-  
 201 dom erasing. Furthermore, we utilize Mixup and CutMix  
 202 with alpha values set to 0.8 and 1.0, respectively, applied  
 203 with an overall probability of 0.5 per batch.

204 **Settings for Language Tasks.** Following [26], we adopt  
 205 their task-specific instructions. For hyperparameter opti-  
 206 mization, we perform a grid search on the development  
 207 set to identify the best configuration for each task. The  
 208 search space includes training epochs  $\{5, 7, 10\}$ , learning  
 209 rates  $\{3e-2, 1e-4, 5e-5\}$ , and batch sizes  $\{8, 16, 32\}$ .

## 210 C. Additional Experiments

### 211 C.1. Impact of Task Similarity

212 **Settings.** To evaluate the effectiveness of our task similarity  
 213 prediction, we analyze how the predicted similarity between  
 214 a learned task and a new task correlates with the accuracy  
 215 gain obtained by transferring importance from that single  
 216 learned task. For each new task, we consider each learned  
 217 task in turn as the sole source and plot a point with its pre-  
 218 dicted similarity on the x-axis and the resulting accuracy  
 219 improvement on the y-axis, as shown in Fig. 2.

220 The learned task set includes the five base tasks  
 221 from § 5.2.1 and five additional tasks: video captioning

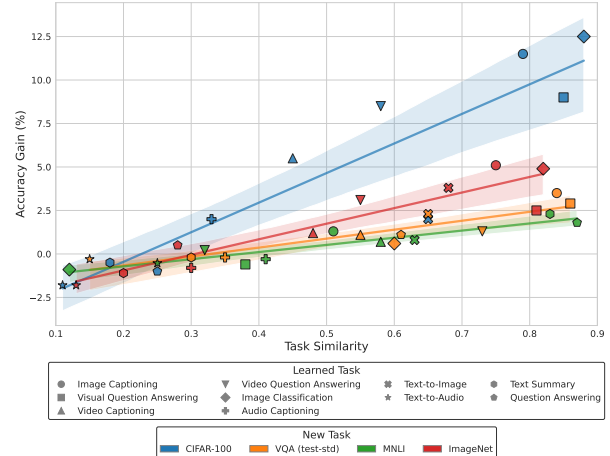

Figure 2. Impact of task similarity on fine-tuning accuracy. Each point denotes the accuracy gain when transferring module importance from a learned task (shape) to a new task (color).

(MSVD [1]), video question answering (MSVD-QA [27]),  
 audio captioning (AudioCaps [16]), text-to-audio (Wav-  
 Caps [19]), and text summarization (CNN/Daily Mail [7]).  
 For new tasks, we use four representative benchmarks that  
 cover both image and NLP modalities: CIFAR-100, VQA  
 (test-std), MNLI, and ImageNet.

**Results.** For each new task, we fit a linear model between  
 predicted similarity and accuracy improvement and report  
 the coefficient of determination  $R^2$ . The  $R^2$  values for  
 CIFAR-100, VQA, MNLI, and ImageNet are 0.82, 0.81,  
 0.84, and 0.86, respectively, indicating a strong positive  
 correlation between task similarity and the benefit of im-  
 portance transfer. In other words, more similar learned  
 tasks tend to provide larger accuracy gains when used as  
 sources for module-importance transfer.

We also make a few observations from Fig. 2. (i) Similar  
 learned tasks yield larger gains for relatively simple new  
 tasks than for more challenging ones. CIFAR-100 (blue  
 line) exhibits the steepest slope: highly similar source  
 tasks can significantly boost accuracy, while dissimilar  
 sources can even degrade performance. In contrast, Im-  
 ageNet (red line) has a gentler slope, likely because it  
 depends on diverse visual features, making it less sen-  
 sitive to any single source task. (ii) Second, trans-  
 ferring from the Text-to-Image task leads to a larger  
 accuracy boost for ImageNet (3.8%) than for CIFAR-100  
 (2.1%), even though both are image classification tasks.  
 This suggests that the richer visual-text alignment  
 learned in Text-to-Image pre-training aligns better with  
 the complex visual concepts required by ImageNet. (iii)  
 When the similarity score between a learned task and a  
 new task falls below 0.35, transferring importance from  
 that learned task typically reduces the new task’s  
 accuracy. Motivated by this, in all experiments we re-

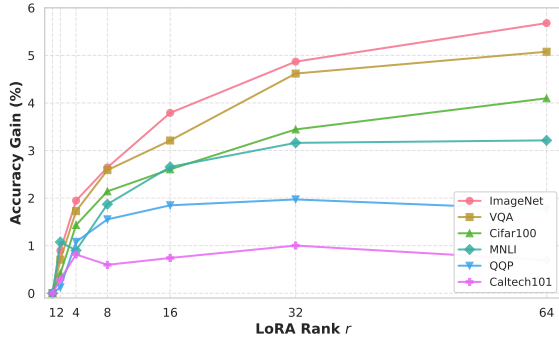

Figure 3. Accuracy gain (%) relative to  $r = 1$  for varying LoRA ranks across different tasks.

| Method | Function $h(r)$             | Cifar100    | ImgNet      | Caltech101  | MNLI        | QQP         | VQA         | Avg         |
|--------|-----------------------------|-------------|-------------|-------------|-------------|-------------|-------------|-------------|
| LoRA   | $r = 8$                     | 67.9        | 87.6        | 88.0        | 86.3        | 90.1        | 73.4        | 82.2        |
| TaskIT | $h(r) \propto 1$            | 77.1        | 83.5        | 86.5        | 80.8        | 85.2        | 68.8        | 80.3        |
|        | $h(r) \propto r$            | 73.9        | 88.9        | 91.4        | 86.2        | 83.1        | 74.2        | 83.0        |
|        | $h(r) \propto \ln r$        | 80.8        | 88.7        | 91.0        | 85.0        | <b>91.1</b> | 74.3        | 85.2        |
|        | $h(r) \propto \sqrt{r}$     | 81.2        | 89.1        | 91.9        | 86.1        | <b>91.5</b> | 74.9        | 85.8        |
|        | $h(r) \propto \sqrt{\ln r}$ | <b>83.4</b> | <b>89.3</b> | <b>92.1</b> | <b>86.3</b> | 89.6        | <b>75.1</b> | <b>86.0</b> |

Table 2. Impact of different rank scaling functions  $h(r)$ . We compare the accuracy (%) of TaskIT using different functions against standard LoRA with fixed rank  $r = 8$ .

255 strict importance transfer to learned tasks whose similar-  
 256 ity exceeds 0.35, ensuring that TaskIT primarily leverages  
 257 sources that yield positive transfer.

## 258 C.2. Impact of Normalized Rank Contribution $h(r)$

259 **Settings.** We choose  $h(r)$  by studying how accuracy scales  
 260 with the LoRA rank  $r$ . First, we vary the LoRA rank  
 261  $r \in \{1, \dots, 64\}$  and measure the relative accuracy gain over  
 262 standard LoRA with rank  $r = 1$  on six representative tasks  
 263 from § 5.2.1. Second, we compare five candidate forms  
 264 of  $h(r)$ , *i.e.* Uniform (1), Linear ( $r$ ), Logarithmic ( $\ln r$ ),  
 265 Square Root ( $\sqrt{r}$ ), and Root-Logarithmic ( $\sqrt{\ln r}$ ), under a  
 266 fixed memory budget, and report average accuracy in Tab. 2  
 267 against standard LoRA with fixed rank  $r = 8$ .

268 **Results.** Fig. 3 shows that accuracy grows sub-linearly with  
 269 rank. Gains from increasing  $r$  are large at small ranks but  
 270 become marginal from  $r = 32$  to 64 despite doubling mem-  
 271 ory. Harder tasks (*e.g.* ImageNet) benefit more from higher  
 272 ranks, whereas easier ones (*e.g.* Caltech101) quickly satu-  
 273 rate. These trends motivate a concave  $h(r)$  that rewards low  
 274 ranks and penalizes linear memory growth at high ranks.

275 Tab. 2 confirms this observation. Uniform scaling yields  
 276 the lowest average accuracy (80.3%) due to under-utilized  
 277 capacity, while Linear scaling (83.0%) over-allocates bud-  
 278 get to high ranks and overfits on simpler tasks. Logarith-  
 279 mic and Square Root scaling improve accuracy to 85.2%  
 280 and 85.8%, respectively. Root-Logarithmic scaling ( $h(r) \propto$   
 281  $\sqrt{\ln r}$ ) achieves the best result at 86.0%, matching the em-  
 282 pirically concave trend and balancing capacity with effi-

| Method             | Backbone | Params (10 <sup>6</sup> ) | Avg Mem. (GB) | Image Avg Acc. | NLP Avg Acc. | VL Avg Acc. |
|--------------------|----------|---------------------------|---------------|----------------|--------------|-------------|
| AdapterFusion [22] | OFA-b    | 0.9                       | 1.6           | 58.6           | 76.2         | 67.3        |
|                    | OFA-l    | 3.7                       | 3.2           | 61.0           | 77.2         | 70.5        |
| UniPT [5]          | OFA-b    | 19.4                      | 1.1           | 71.2           | 83.4         | 74.1        |
|                    | OFA-l    | 49.2                      | 2.8           | 73.6           | 84.7         | 76.0        |
| AutoLoRA [31]      | OFA-b    | 3.2                       | 1.8           | 73.8           | 85.7         | 74.4        |
|                    | OFA-l    | 8.8                       | 4.5           | <b>76.1</b>    | <b>86.5</b>  | <b>78.5</b> |
| TaskIT             | OFA-b    | 1.9                       | 0.8           | 73.9           | 84.6         | 75.3        |
|                    | OFA-l    | 5.1                       | 2.3           | <u>74.9</u>    | <u>86.1</u>  | <u>78.1</u> |

Table 3. Performance with other backbones. Only the most accurate Zero-FT, non-LoRA, and LoRA-based baselines in the cross-modal setting are included. Best results are **bolded**.

ciency. Thus, we adopt  $h(r) \propto \sqrt{\ln r}$  in all experiments. 283

## 284 C.3. Impact of Other Backbones

**Settings.** To assess architectural generalization, we extend 285  
 TaskIT beyond Janus-Pro and adopt OFA [25] as the vision- 286  
 language backbone following [26], using both Base (OFA- 287  
 b, 180M) and Large (OFA-l, 470M) variants. We compare 288  
 TaskIT with three SOTA baselines from § 5.2.1: Adapter- 289  
 Fusion [22] (Zero-FT), UniPT [5] (Non-LoRA), and Au- 290  
 toLoRA [31] (LoRA-based). For each backbone, we report 291  
 average accuracy over the cross-modal task suite in § 5.2.1, 292  
 covering Image, NLP, and VL modalities, under the same 293  
 memory budget. 294

**Results.** As shown in Tab. 3, TaskIT offers the best trade-off 295  
 between memory and accuracy across all backbones. Com- 296  
 pared with AutoLoRA, TaskIT achieves similar accuracy 297  
 (within 0.4% on OFA-l) while reducing memory from 4.5 298  
 GB to 2.3 GB, a 48.8% saving. AdapterFusion uses fewer 299  
 parameters but suffers from a lower accuracy. Although 300  
 UniPT is memory-efficient on OFA-b, it scales poorly on 301  
 OFA-l, requiring 49.2M trainable parameters versus only 302  
 5.1M for TaskIT. 303

## 304 C.4. Performance with Cold-start Setting

**Settings.** To assess the robustness of TaskIT in a resource- 305  
 scarce cold-start setting, we initialize the multi-LoRA 306  
 model with only a single set of modules trained on 307  
 ImageNet-21k, and evaluate fine-tuning on the 19 down- 308  
 stream tasks of VTAB-1K [29] using a frozen ViT-Base 309  
 backbone (86M parameters). 310

**Results.** Tab. 4 presents the results on VTAB-1K. Even 311  
 with importance transfer limited to a single learned task 312  
 (ImageNet-21k), TaskIT remains highly effective. With 313  
 a memory budget factor  $M_B = 0.6$ , our method attains 314  
 79.3% average accuracy, outperforming the Zero-FT base- 315  
 line AdapterFusion (59.1%) by over 20% and highlight- 316  
 ing the limitations of simple upstream module fusion, par- 317  
 ticularly under cold-start with few learned tasks. More- 318  
 over, at  $M_B = 0.6$ , TaskIT attains a higher average ac- 319

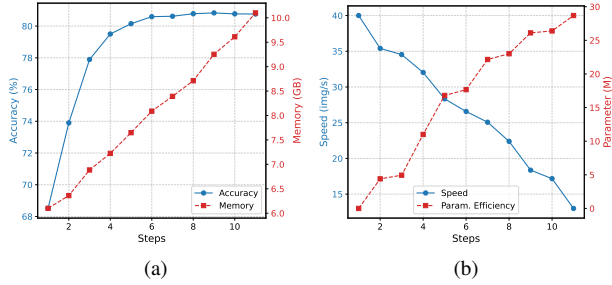

Figure 4. Impact of the memory budget  $M_B$ , showing the trade-offs between (a) memory usage (GB) and accuracy (%), and (b) training speed (img/sec) and trainable parameters (M).

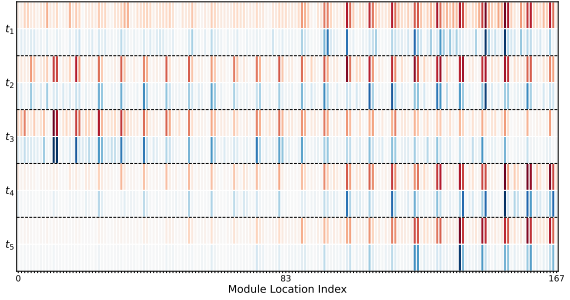

Figure 5. Predicted vs. Actual Importance of LoRA Modules. The heatmap compares the predicted importance (blue) with the actual importance (red) for LoRA modules across different location indices (x-axis) and tasks  $t_1$  to  $t_5$  (y-axis).

320 curacy (79.3% vs. 78.5% for UniPT) with 56% fewer  
 321 trainable parameters. Compared with AutoLoRA, it nearly  
 322 matches the state-of-the-art accuracy (79.5%) while using  
 323 about 35% fewer parameters. This shows that our memory-  
 324 aware scheduler effectively exploits the structural impor-  
 325 tance of the ImageNet module to prioritize critical param-  
 326 eters and maximize performance in the resource-constrained  
 327 cold-start phase.

### 328 C.5. Impact of Memory Budget $M_B$

329 **Settings.** This experiment tests how the memory budget  
 330  $M_B$  affects TaskIT by varying  $M_B$  from a no-update setting  
 331 to full LoRA fine-tuning, spanning 6.4 GB to 10.3 GB in 11  
 332 discrete steps. Following the cross-modal setup in § 5.2.1,  
 333 we report the average fine-tuning accuracy and the number  
 334 of trainable parameters at each memory level. The smallest  
 335 budget corresponds to reusing existing LoRAs without inser-  
 336 ting new modules, while the largest budget matches full  
 337 LoRA fine-tuning.

338 **Results.** As shown in Fig. 4a, accuracy increases rapidly  
 339 with  $M_B$  and saturates around step 6. Larger budgets allow  
 340 TaskIT to insert more modules and assign higher ranks to  
 341 important ones. Once these critical modules are fully acti-  
 342 vated, allocating memory to less important modules yields  
 343 diminishing returns and may even cause mild overfitting.  
 344 Fig. 4b further shows that the number of trainable param-  
 345 eters grows with  $M_B$ , which in turn slows training due to the  
 346 additional gradient computations.

### 347 C.6. Effectiveness of Importance Prediction

348 **Settings.** We evaluate the effectiveness of the task impor-  
 349 tance predictor by comparing the predicted importance of  
 350 each module with its actual importance across locations.  
 351 We consider five tasks:  $t_1$  Text-to-Image (CUB-200 [24]),  
 352  $t_2$  Image Captioning (Flickr8k [8]),  $t_3$  Image Classification  
 353 (Pascal VOC [6]),  $t_4$  Question Answering (SQuAD [23]),  
 354 and  $t_5$  Text Summarization (CNN/Daily Mail [7]). Fol-  
 355 lowing [17], we approximate the actual importance of each

356 module by measuring the accuracy gain from individually  
 357 inserting and fine-tuning that module. Fig. 5 visualizes the  
 358 predicted (blue) and actual (red) importance across loca-  
 359 tions. We further quantify their alignment using Spearman’s  
 360 rank correlation coefficient  $\rho$  and corresponding  $p$ -values.

361 **Results.** In Fig. 5, the predicted importance closely tracks  
 362 the actual importance at each location. Spearman’s  $\rho$  con-  
 363 firms strong positive correlations:  $\rho = 0.8862$  for  $t_2$ ,  
 364  $0.8837$  for  $t_3$ ,  $0.8766$  for  $t_4$ , and  $0.8679$  for  $t_5$ . Even for  
 365 the challenging cross-modal task  $t_1$ , we obtain  $\rho = 0.6819$ .  
 366 All correlations are statistically significant with  $p < 10^{-24}$ ,  
 367 indicating that TaskIT accurately predicts the relative im-  
 368 portance of unknown modules.

369 We also observe task-specific patterns. For  $t_4$  and  $t_5$ , im-  
 370 portance concentrates in deeper locations, consistent with  
 371 their need for high-level semantic reasoning and genera-  
 372 tion. For  $t_3$ , importance peaks in shallow and middle loca-  
 373 tions, where visual features are extracted and mapped to  
 374 new classes. For  $t_2$ , importance spreads across most loca-  
 375 tions, reflecting its cross-modal nature and the need to adapt  
 376 both early visual processing and later text generation stages.

### 377 C.7. Effectiveness of Module Memory Prediction

378 **Settings.** We evaluate the accuracy of our block-based  
 379 memory predictor (§ 4.3) by comparing its predictions to  
 380 ground-truth estimates from PyTorch profiling tools [4] and  
 381 the linear index baseline [17], using the Janus-Pro back-  
 382 bone. Fig. 6 shows the normalized memory cost profiles,  
 383 comparing the linear index prediction (gray), actual esti-  
 384 mated memory (green), and our TaskIT prediction (blue).

385 **Results.** As shown in Fig. 6, TaskIT’s predictions closely  
 386 match the actual memory usage, achieving a Pearson corre-  
 387 lation coefficient of  $r = 0.94$ . In contrast, the linear index  
 388 prediction fails to capture the structural complexities of the  
 389 Transformer architecture. We observe that memory usage  
 390 within each block follows a sawtooth pattern, where mod-  
 391 ules like  $W_k$ ,  $W_v$ , and  $W_{FFN}^2$  incurring higher costs due to

|                     | Param( $10^6$ ) | Natural     |             |             |             |             |             |             | Specialized |             |             |             | Structured  |             |             |             |             |             | Average     |             |             |                 |                |             |
|---------------------|-----------------|-------------|-------------|-------------|-------------|-------------|-------------|-------------|-------------|-------------|-------------|-------------|-------------|-------------|-------------|-------------|-------------|-------------|-------------|-------------|-------------|-----------------|----------------|-------------|
|                     |                 | Cifar100    | Caltech101  | DTD         | Flower102   | Pets        | SVHN        | Sun397      | Camelyon    | EuroSAT     | Resisc45    | Retinopathy | Clevr-Count | Clevr-Dist  | DMLab       | KITTI-Dist  | dSpr-Loc    | dSpr-Ori    | sNORB-Azim  | sNORB-Ele   | Avg Natural | Avg Specialized | Avg Structured | Average     |
| Full[12, 14]        | 85.8            | 68.9        | 87.7        | 64.3        | 97.2        | 86.9        | 87.4        | 38.8        | 79.7        | 95.7        | 84.2        | 73.9        | 56.3        | 58.6        | 41.7        | 65.5        | 57.5        | 46.7        | 25.7        | 29.1        | 75.9        | 83.4            | 47.6           | 68.9        |
| Linear[12, 14]      | 0               | 64.4        | 85.0        | 63.2        | 97.0        | 86.3        | 36.6        | 51.0        | 78.5        | 87.5        | 68.5        | 74.0        | 34.3        | 30.6        | 33.2        | 55.4        | 12.5        | 20.0        | 9.6         | 19.2        | 69.1        | 77.1            | 26.9           | 57.6        |
| BitFit[15, 28]      | 0.10            | 72.8        | 87.0        | 59.2        | 97.5        | 85.3        | 59.9        | 51.4        | 78.7        | 91.6        | 72.9        | 69.8        | 61.5        | 55.6        | 32.4        | 55.9        | 66.6        | 40.0        | 15.7        | 25.1        | 73.3        | 78.3            | 44.1           | 65.2        |
| VPT[12, 14]         | 0.53            | 78.8        | 90.8        | 65.8        | 98.0        | 88.3        | 78.1        | 49.6        | 81.8        | 96.1        | 83.4        | 68.4        | 68.5        | 60.0        | 46.5        | 72.8        | 73.6        | 47.9        | 32.9        | 37.8        | 78.5        | 82.4            | 55.0           | 72.0        |
| RS-Bypass. [13]     | 0.42            | 64.5        | 88.8        | 73.2        | 99.4        | 90.6        | 63.5        | <u>57.2</u> | 85.5        | 95.2        | 82.4        | 75.2        | 70.4        | 61.0        | 40.2        | 66.8        | 79.2        | 52.6        | 26.0        | 49.3        | 76.7        | 84.6            | 55.7           | 72.3        |
| Adapter [9, 14]     | 0.16            | 69.2        | 90.1        | 68.0        | 98.8        | 89.9        | 82.8        | 54.3        | 84.0        | 94.9        | 81.9        | 75.5        | 80.9        | 65.3        | 48.6        | 78.3        | 74.8        | 48.5        | 29.9        | 41.6        | 79.0        | 84.1            | 58.5           | 73.9        |
| LoRA[10]            | 0.29            | 67.1        | 91.4        | 69.4        | 98.8        | 90.4        | 85.3        | 54.0        | 84.9        | 95.3        | 84.4        | 73.6        | <u>82.9</u> | <b>69.2</b> | 49.8        | 78.5        | 75.7        | 47.1        | 31.0        | 44.0        | 79.5        | 84.6            | 59.8           | 74.5        |
| AdaptFormer[2, 14]  | 0.16            | 70.8        | 91.2        | 70.5        | 99.1        | 90.9        | 86.6        | 54.8        | 83.0        | 95.8        | 84.4        | 76.3        | 81.9        | 64.3        | 49.3        | 80.3        | 76.3        | 45.7        | 31.7        | 41.1        | 80.6        | 84.9            | 58.8           | 74.7        |
| NOAH [32]           | 0.36            | 69.6        | 92.7        | 70.2        | 99.1        | 90.4        | 86.1        | 53.7        | 84.4        | 95.4        | 83.9        | 75.8        | 82.8        | <u>68.9</u> | 49.9        | 81.7        | 81.8        | 48.3        | 32.8        | 44.2        | 80.3        | 84.9            | 61.3           | 75.5        |
| FacT-TK [15]        | 0.06            | 70.6        | 90.6        | 70.8        | 99.1        | 90.7        | 88.6        | 54.1        | 84.8        | 96.2        | 84.5        | 75.7        | 82.6        | 68.2        | 49.8        | 80.7        | 80.8        | 47.4        | 33.2        | 43.0        | 80.6        | 85.3            | 60.7           | 75.6        |
| RS [13]             | 0.55            | 75.2        | 92.7        | 71.9        | 99.3        | <b>91.9</b> | 86.7        | <b>58.5</b> | 86.7        | 95.6        | 85.0        | 74.6        | 80.2        | 63.6        | 50.6        | 80.2        | 85.4        | 55.7        | 31.9        | 42.0        | 82.3        | 85.5            | 61.2           | 76.3        |
| Convpass [14]       | 0.33            | 72.3        | 91.2        | 72.2        | 99.2        | 90.9        | <b>91.3</b> | 54.9        | 84.2        | 96.1        | 85.3        | 75.6        | 82.3        | 67.9        | <u>51.3</u> | 80.0        | 85.9        | 53.1        | 36.4        | 44.4        | 81.7        | 85.3            | 62.7           | 76.6        |
| HST [18]            | 0.78            | 76.7        | <b>94.1</b> | 74.8        | 99.6        | 91.1        | <u>91.2</u> | 52.3        | 87.1        | 96.3        | <b>88.6</b> | <u>76.5</u> | <b>85.4</b> | 63.7        | <b>52.9</b> | 81.7        | 87.2        | 56.8        | 35.8        | <b>52.1</b> | 82.8        | 87.1            | 64.5           | 78.1        |
| LoSA [20]           | 0.19            | 82.5        | 92.8        | 76.1        | <u>99.7</u> | <u>90.5</u> | 82.0        | 55.8        | 86.6        | 97.1        | 87.0        | 76.7        | 81.5        | 62.3        | 48.6        | 82.1        | 94.2        | 61.7        | 47.9        | 45.6        | 82.8        | 86.9            | 65.5           | 78.4        |
| AdapterFusion [22]  | 0.23            | 67.4        | 67.8        | 55.5        | 77.9        | 73.3        | 58.3        | 41.3        | 69.8        | 85.9        | 70.7        | 51.9        | 55.1        | 50.8        | 35.0        | 63.8        | 59.0        | 36.2        | 26.0        | 31.4        | 63.1        | 69.6            | 44.7           | 59.1        |
| UniPT [5]           | 1.21            | 82.7        | 93.0        | 76.2        | <u>99.7</u> | 90.6        | 82.1        | 55.9        | 86.8        | 97.1        | 87.2        | 77.0        | 81.8        | 62.4        | 49.0        | 82.2        | 94.3        | 61.8        | 48.0        | 45.8        | 82.9        | 87.0            | 65.6           | 78.5        |
| AutoLoRA [31]       | 0.82            | <b>83.7</b> | <u>93.7</u> | <b>77.7</b> | <b>99.8</b> | <u>91.5</u> | 82.9        | 56.7        | <b>87.6</b> | <b>97.7</b> | <u>88.4</u> | <b>77.6</b> | 82.2        | 64.2        | 50.6        | <b>84.0</b> | <b>94.9</b> | <b>63.2</b> | <b>50.2</b> | 48.5        | <b>83.7</b> | <b>87.8</b>     | <b>67.2</b>    | <b>79.5</b> |
| TaskIT, $M_B = 0.4$ | 0.37            | 82.6        | 92.7        | 76.7        | 99.7        | 90.7        | 81.4        | 55.5        | 86.8        | 97.1        | 87.4        | 76.7        | 80.4        | 62.1        | 48.8        | 82.4        | 92.7        | 61.4        | 48.7        | 46.7        | 82.8        | 87.0            | 65.3           | 78.3        |
| TaskIT, $M_B = 0.5$ | 0.44            | 83.1        | 93.0        | 77.1        | 99.7        | 91.0        | 82.0        | 56.0        | 87.1        | 97.3        | 87.8        | 77.1        | 81.2        | 63.0        | 49.5        | 83.0        | 93.6        | 62.2        | 49.3        | 47.6        | 83.1        | 87.3            | 66.2           | 78.9        |
| TaskIT, $M_B = 0.6$ | 0.53            | <u>83.5</u> | 93.5        | <u>77.5</u> | <b>99.8</b> | 91.4        | 82.8        | 56.5        | <u>87.5</u> | <u>97.6</u> | <u>88.2</u> | <u>77.5</u> | 81.8        | 63.8        | 50.2        | <u>83.5</u> | <u>94.5</u> | 62.8        | 49.8        | 48.0        | <u>83.6</u> | <u>87.7</u>     | <u>66.8</u>    | <u>79.3</u> |

Table 4. Comparison to state-of-the-art parameter-efficient finetuning methods on VTAB-1K [29]. Following standard practice, the final ‘‘Average’’ is the average of three preceding groupwise averages. Parameters denotes the number of learnable parameters excluding the final classification layer. **Best results** are bolded, and second-best underlined.

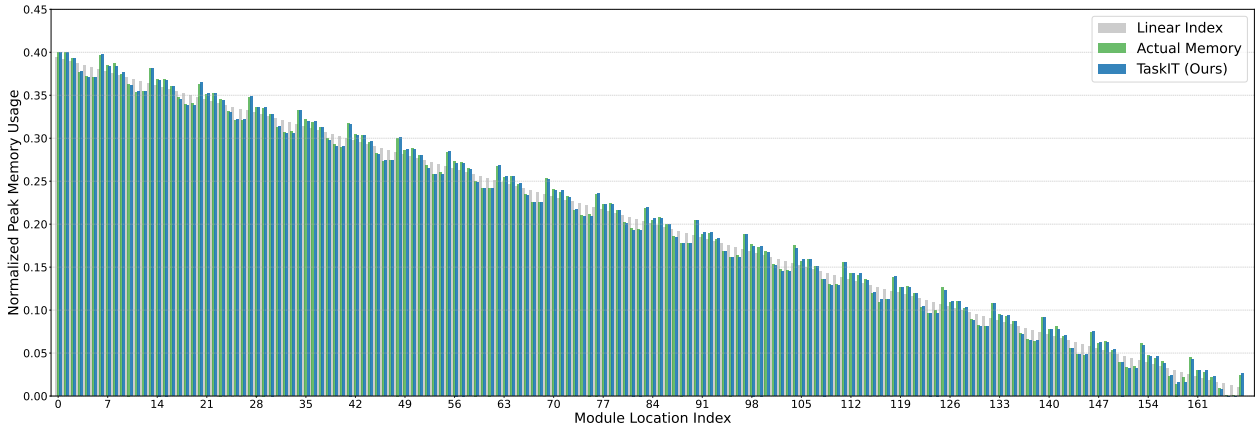

Figure 6. Comparison of normalized module memory usage predictions/estimations. TaskIT accurately captures the structural sawtooth memory pattern of Transformer blocks, aligning closely with the actual memory usage compared to the linear index baseline.

392 the retention of large activations, while  $W_o$  and  $W_{FFN}^1$  are  
393 more memory-efficient, relying on smaller activations.

### 394 C.8. Edge-device evaluation and cumulative over- 395 head

396 We evaluate TaskIT on a Jetson Orin Nano (8GB GPU) un-  
397 der a QLoRA setting, and show the edge-device platform  
398 in Fig. 7. Janus-Pro-1B is loaded in 8-bit via *BitsAndBytes*,

while fine-tuning is performed in 16-bit for 10 epochs. We 399  
report accuracy, peak memory, training latency, and energy 400  
consumption in Table 5, and summarize the cumulative run- 401  
time and memory overhead of the major TaskIT compo- 402  
nents in Table 6. The results show that TaskIT preserves the 403  
best memory–accuracy trade-off under quantization, while 404  
remaining practical on real edge hardware, and that its ad- 405  
ditional system overhead remains modest relative to sparse 406

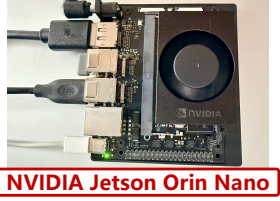

Figure 7. Jetson Orin Nano platform used for the edge-device evaluation.

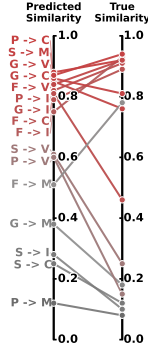

Figure 8. Validation of the task-similarity approximation by comparing the predicted similarities against the true similarities after training the new-task LoRA modules.

407 fine-tuning.

### 408 C.9. Task similarity approximation and sensitivity 409 analysis

410 Eq. (4) can be interpreted as a first-order Taylor approx-  
411 imation of the representation update induced by adapta-  
412 tion. To validate the approximation empirically, we train  
413 the new-task LoRA modules  $w_{n+1}$  and compute the true  
414 similarity using  $x(\theta + w_i; d)$  and  $x(\theta + w_{n+1}; d)$  for all  
415 16 learned→new task pairs in the setting of Appendix C.1  
416 in Fig. 8. The predicted similarities closely match the true  
417 similarities, with Pearson correlation  $r = 0.86$ .

418 With batch-mean loss reduction and cosine similarity  
419 dominated by direction rather than magnitude, the method  
420 is not sensitive to the exact step size  $\eta$ . In practice, we  
421 set  $\eta = 10$  so that the perturbation magnitude satisfies  
422  $\|\eta \nabla_x L\| / \|x\| \approx 0.1$ . We further evaluate the sensitivity to  
423 both  $\eta$  and the task-similarity threshold across four cross-  
424 modal tasks, and observe stable behavior over a broad hy-  
425 perparameter range in Fig. 9.

### 426 C.10. Module importance prediction

427 Fig. 10 validates the predicted module importance against  
428 realized performance gains after insertion. The formulation  
429 in Eq. (3) is evaluated only on shared backbone projection  
430 matrices  $W_k$ , making it agnostic to modality-specific en-

coders, decoders, and task heads. We additionally provide  
431 calibration plots on VQA, ImageNet, and MNLI by corre-  
432 lating the predicted module importance with the ablated ac-  
433 curacy drop, which we treat as the true importance. 434

We also ablate Eq. (3) by removing the denomina-  
435 tor  $|x(W_k; d)|_1$  in Table 7, replacing new-task data with  
436 learned-task data, and substituting the  $\ell_1$  norm with  $\ell_2$ . The  
437 ratio-based formulation used in TaskIT remains the most ro-  
438 bust among these alternatives. 439

### 440 C.11. Module insertion scheduler and additional 441 analyses

We compare the proposed dynamic-programming scheduler  
442 with greedy search and evolutionary search in Table 8. The  
443 DP scheduler achieves the best downstream accuracy while  
444 keeping search overhead low. This supports the claim that a  
445 more structured search is beneficial even under tight mem-  
446 ory constraints. 447

The DP formulation assumes that the incremental mem-  
448 ory cost  $\Delta M$  depends only on the nearest predecessor  $k_s$ .  
449 This is exact when  $k_s$  and the candidate location lie on the  
450 same sequential backward path, including across different  
451 blocks and within the same FFN. When they belong to par-  
452 allel  $Q/K/V$  branches of the same attention block, the ap-  
453 proximation can over-count at most one branch activation,  
454 and the error does not propagate across blocks. 455

For scalability with the number of learned tasks, the ideal  
456 feature of the new task is obtained with one backward pass,  
457 and similarities to prior tasks are then computed with  $n$   
458 forward passes. Because the learned tasks are processed se-  
459 quentially, peak memory remains constant, while latency  
460 scales linearly with the number of prior tasks in Fig. 11. 461

We also report explicit accuracy–memory trade-offs of  
462 TaskIT at larger budgets in Table 9. Under 10.5GB and  
463 14.5GB budgets, TaskIT continues to improve average ac-  
464 curacy as more memory is made available, showing that the  
465 framework supports flexible budget-aware adaptation. 466

### 467 References

- 468 [1] David Chen and William B Dolan. Collecting highly  
469 parallel data for paraphrase evaluation. In *Proceedings  
470 of the ACL*, pages 190–200, 2011. 4
- 471 [2] Shoufa Chen, Chongjian Ge, Zhan Tong, Jiangliu  
472 Wang, Yibing Song, Jue Wang, and Ping Luo. Adapt-  
473 former: Adapting vision transformers for scalable vi-  
474 sual recognition. *Advances in Neural Information Pro-  
475 cessing Systems*, 35:16664–16678, 2022. 3, 7
- 476 [3] Alexandra Chronopoulou, Matthew E Peters, Alexan-  
477 der Fraser, and Jesse Dodge. Adaptersoup: Weight  
478 averaging to improve generalization of pretrained lan-  
479 guage models. *arXiv preprint arXiv:2302.07027*,  
480 2023. 2

| Method        | CIFAR-100 (VTAB-1K) |                        |                         |                        | MRPC                |                        |                         |                        |
|---------------|---------------------|------------------------|-------------------------|------------------------|---------------------|------------------------|-------------------------|------------------------|
|               | Acc. (%) $\uparrow$ | Mem. (GB) $\downarrow$ | Lat. (min) $\downarrow$ | Eng. (kJ) $\downarrow$ | Acc. (%) $\uparrow$ | Mem. (GB) $\downarrow$ | Lat. (min) $\downarrow$ | Eng. (kJ) $\downarrow$ |
| LoRAHub       | 68.2                | <b>5.2</b>             | <b>11.5</b>             | <b>9.6</b>             | 78.5                | <b>4.7</b>             | <b>22.3</b>             | <b>18.9</b>            |
| LoRA          | 76.2                | <b>8.9*</b>            | 112.4                   | 94.8                   | 87.1                | <b>8.1*</b>            | 205.5                   | 180.8                  |
| UniPT         | 75.1                | 7.7                    | 63.5                    | 51.3                   | 86.8                | 7.3                    | 147.4                   | 131.6                  |
| TaskIT (Ours) | <b>76.4</b>         | 6.5                    | 65.7                    | 52.4                   | <b>87.5</b>         | 5.8                    | 143.2                   | 125.4                  |

Table 5. Edge-device evaluation on Jetson Orin Nano under a QLoRA setup. \* indicates that memory swapping occurred.

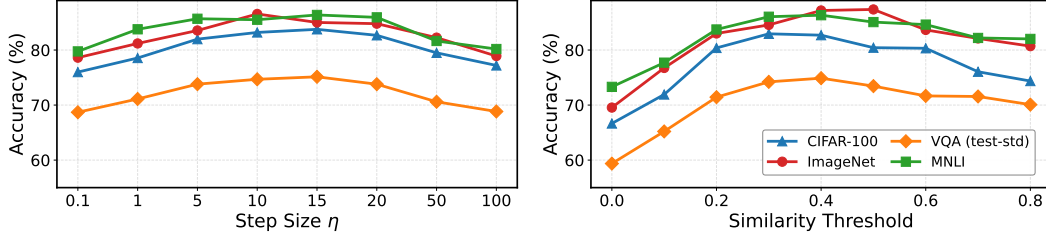

Figure 9. Sensitivity analysis with respect to the simulation step size  $\eta$  and the task-similarity threshold across four cross-modal tasks.

| TaskIT module         | Time (s) | Ratio (%) | Peak Mem. (GB) |
|-----------------------|----------|-----------|----------------|
| Importance estimation | 53.7     | 1.4       | 4.9            |
| Memory profiling      | 92.2     | 2.3       | 4.6            |
| DP scheduler          | 28.5     | 0.7       | 0.04           |
| Sparse fine-tuning    | 3768.2   | 95.6      | 6.5            |

Table 6. Cumulative overhead of the major components of TaskIT on CIFAR-100 on Jetson. The extra overhead is modest relative to sparse fine-tuning.

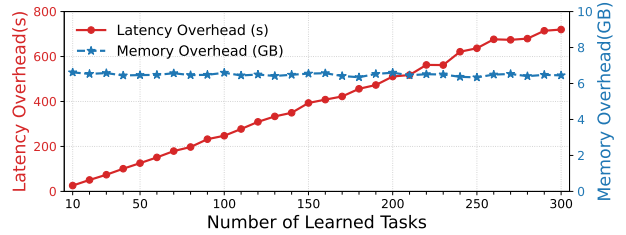

Figure 11. Scalability of task-similarity computation with respect to the number of learned tasks. Peak memory remains constant, while latency scales approximately linearly.

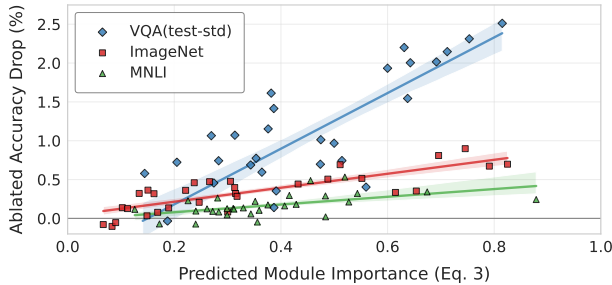

Figure 10. Calibration plots correlating predicted module importance with ablated accuracy drop on VQA, ImageNet, and MNLI.

| Eq. (3) variant            | Correlation $\uparrow$ | Acc. (%) $\uparrow$ |
|----------------------------|------------------------|---------------------|
| w/o denominator (no ratio) | 0.39                   | 80.5                |
| w/ learned-task data       | 0.53                   | 81.2                |
| w/ $\ell_2$ norm           | 0.68                   | 83.3                |
| TaskIT (ours)              | <b>0.71</b>            | <b>83.6</b>         |
| Ablated accuracy drop      | 1.00                   | 85.5                |

Table 7. Ablation of the importance metric in Eq. (3). The last row is the oracle importance measured by ablated accuracy drop after full-LoRA fine-tuning on the new task.

- [4] PyTorch Developers. Pytorch profiler. <https://docs.pytorch.org/stable/profiler.html>. 481–483
- [5] Haiwen Diao, Bo Wan, Ying Zhang, Xu Jia, Huchuan Lu, and Long Chen. Unipt: Universal parallel tuning for transfer learning with efficient parameter and memory. In *Proceedings of the IEEE/CVF Conference on Computer Vision and Pattern Recognition*, pages 28729–28740, 2024. 3, 5, 7 484–489
- [6] Mark Everingham, Luc Van Gool, Christopher KI Williams, John Winn, and Andrew Zisserman. The pascal visual object classes (voc) challenge. *International journal of computer vision*, 88(2):303–338, 2010. 6 490–494
- [7] Karl Moritz Hermann, Tomas Kocisky, Edward Grefenstette, Lasse Espeholt, Will Kay, Mustafa Suleyman, and Phil Blunsom. Teaching machines to read and comprehend. *Advances in neural information processing systems*, 28, 2015. 4, 6 495–499
- [8] Micah Hodosh, Peter Young, and Julia Hockenmaier. Framing image description as a ranking task: Data, 501

| Method              | Search overhead |               | Sparse LoRA tuning |             |               |
|---------------------|-----------------|---------------|--------------------|-------------|---------------|
|                     | Time (s) ↓      | Memory (MB) ↓ | Acc. (%) ↑         | Param (M) ↓ | Memory (GB) ↓ |
| Greedy search       | <b>1.2</b>      | <b>8.2</b>    | 77.5               | <b>9.1</b>  | 7.9           |
| Evolutionary search | 628.5           | 26.7          | 80.1               | 15.4        | 8.0           |
| DP search (ours)    | 13.2            | 42.3          | <b>80.4</b>        | 16.8        | <b>7.8</b>    |

Table 8. Comparison of the scheduler in TaskIT with greedy and evolutionary search.

| Method                    | Nat. Avg Acc. ↑ | Spec. Avg Acc. ↑ | Struc. Avg Acc. ↑ | Memory (GB) ↓ |
|---------------------------|-----------------|------------------|-------------------|---------------|
| TaskIT ( $M_B = 10.5$ GB) | 84.1            | 87.6             | 68.5              | <b>10.3</b>   |
| TaskIT ( $M_B = 14.5$ GB) | <b>84.7</b>     | <b>87.7</b>      | <b>70.2</b>       | 14.4          |

Table 9. Accuracy–memory trade-offs of TaskIT under larger memory budgets.

- 502 models and evaluation metrics. *Journal of Artificial*  
503 *Intelligence Research*, 47:853–899, 2013. 6
- 504 [9] Neil Houlsby, Andrei Giurgiu, Stanislaw Jastrzebski, Bruna Morrone, Quentin De Laroussilhe, Andrea Gesmundo, Mona Attariyan, and Sylvain Gelly. Parameter-efficient transfer learning for nlp. In *Proceedings of the ICML*, pages 2790–2799. PMLR, 2019. 3, 7
- 505  
506  
507  
508  
509
- 510 [10] Edward J Hu, Yelong Shen, Phillip Wallis, Zeyuan Allen-Zhu, Yanzhi Li, Shean Wang, Lu Wang, Weizhu Chen, et al. Lora: Low-rank adaptation of large language models. *ICLR*, 1(2):3, 2022. 3, 7
- 511  
512  
513
- 514 [11] Chengsong Huang, Qian Liu, Bill Yuchen Lin, Tianyu Pang, Chao Du, and Min Lin. Lorahub: Efficient cross-task generalization via dynamic lora composition. In *Proceedings of the COLM*, 2024. 2
- 515  
516  
517
- 518 [12] Menglin Jia, Luming Tang, Bor-Chun Chen, Claire Cardie, Serge Belongie, Bharath Hariharan, and Ser-Nam Lim. Visual prompt tuning. In *European conference on computer vision*, pages 709–727. Springer, 2022. 2, 7
- 519  
520  
521  
522
- 523 [13] Zeyinzi Jiang, Chaojie Mao, Ziyuan Huang, Ao Ma, Yiliang Lv, Yujun Shen, Deli Zhao, and Jingren Zhou. Res-tuning: A flexible and efficient tuning paradigm via unbinding tuner from backbone. *Advances in Neural Information Processing Systems*, 36:42689–42716, 2023. 2, 3, 7
- 524  
525  
526  
527  
528
- 529 [14] Shibo Jie and Zhi-Hong Deng. Convolutional bypasses are better vision transformer adapters. *arXiv preprint arXiv:2207.07039*, 2022. 2, 3, 7
- 530  
531
- 532 [15] Shibo Jie and Zhi-Hong Deng. Fact: Factor-tuning for lightweight adaptation on vision transformer. In *Proceedings of the AAAI conference on artificial intelligence*, pages 1060–1068, 2023. 3, 7
- 533  
534  
535
- 536 [16] Chris Dongjoo Kim, Byeongchang Kim, Hyunmin Lee, and Gunhee Kim. Audiocaps: Generating captions for audios in the wild. In *Proceedings of the 2019*  
537  
538
- Conference of the North American Chapter of the Association for Computational Linguistics: Human Language Technologies, Volume 1 (Long and Short Papers)*, pages 119–132, 2019. 4
- 539  
540  
541  
542
- [17] Ji Lin, Ligeng Zhu, Wei-Ming Chen, Wei-Chen Wang, Chuang Gan, and Song Han. On-device training under 256kb memory. *Advances in Neural Information Processing Systems*, 35:22941–22954, 2022. 6
- 543  
544  
545  
546
- [18] Weifeng Lin, Ziheng Wu, Wentao Yang, Mingxin Huang, Jun Huang, and Lianwen Jin. Hierarchical side-tuning for vision transformers. *arXiv preprint arXiv:2310.05393*, 2023. 3, 7
- 547  
548  
549  
550
- [19] Xinhao Mei, Chutong Meng, Haohe Liu, Qiuqiang Kong, Tom Ko, Chengqi Zhao, Mark D Plumbley, Yuexian Zou, and Wenwu Wang. Wavcaps: A chatgpt-assisted weakly-labelled audio captioning dataset for audio-language multimodal research. *arXiv preprint arXiv:2303.17395*, 2023. 4
- 551  
552  
553  
554  
555  
556
- [20] Otniel-Bogdan Mercea, Alexey Gritsenko, Cordelia Schmid, and Anurag Arnab. Time-memory-and parameter-efficient visual adaptation. In *Proceedings of the IEEE/CVF Conference on Computer Vision and Pattern Recognition*, pages 5536–5545, 2024. 2, 3, 4, 7
- 557  
558  
559  
560  
561  
562
- [21] Rui Pan, Xiang Liu, Shizhe Diao, Renjie Pi, Jipeng Zhang, Chi Han, and Tong Zhang. Lisa: Layerwise importance sampling for memory-efficient large language model fine-tuning. *Advances in Neural Information Processing Systems*, 37:57018–57049, 2024. 3
- 563  
564  
565  
566  
567
- [22] Jonas Pfeiffer, Aishwarya Kamath, Andreas Rücklé, Kyunghyun Cho, and Iryna Gurevych. Adapterfusion: Non-destructive task composition for transfer learning. 2021. 2, 5, 7
- 568  
569  
570  
571
- [23] Pranav Rajpurkar, Jian Zhang, Konstantin Lopyrev, and Percy Liang. Squad: 100,000+ questions for machine comprehension of text. *arXiv preprint arXiv:1606.05250*, 2016. 6
- 572  
573  
574  
575

- 576 [24] Catherine Wah, Steve Branson, Peter Welinder, Pietro  
577 Perona, and Serge Belongie. The caltech-ucsd birds-  
578 200-2011 dataset. 2011. 6
- 579 [25] Peng Wang, An Yang, Rui Men, Junyang Lin, Shuai  
580 Bai, Zhikang Li, Jianxin Ma, Chang Zhou, Jin-  
581 gren Zhou, and Hongxia Yang. Ofa: Unifying ar-  
582 chitectures, tasks, and modalities through a simple  
583 sequence-to-sequence learning framework. In *In-  
584 ternational conference on machine learning*, pages  
585 23318–23340. PMLR, 2022. 5
- 586 [26] Chengyue Wu, Teng Wang, Yixiao Ge, Zeyu Lu,  
587 Ruisong Zhou, Ying Shan, and Ping Luo.  $\pi$ -tuning:  
588 Transferring multimodal foundation models with op-  
589 timal multi-task interpolation. In *Proceedings of the  
590 ICML, 2023*. 3, 4, 5
- 591 [27] Dejing Xu, Zhou Zhao, Jun Xiao, Fei Wu, Hanwang  
592 Zhang, Xiangnan He, and Yueting Zhuang. Video  
593 question answering via gradually refined attention  
594 over appearance and motion. In *Proceedings of the  
595 25th ACM international conference on Multimedia*,  
596 pages 1645–1653, 2017. 4
- 597 [28] Elad Ben Zaken, Shauli Ravfogel, and Yoav Gold-  
598 berg. Bitfit: Simple parameter-efficient fine-tuning for  
599 transformer-based masked language-models. In *Pro-  
600 ceedings of the ACL, 2022*. 2, 7
- 601 [29] Xiaohua Zhai, Joan Puigcerver, Alexander  
602 Kolesnikov, Pierre Ruysen, Carlos Riquelme,  
603 Mario Lucic, Josip Djolonga, Andre Susano Pinto,  
604 Maxim Neumann, Alexey Dosovitskiy, et al. A  
605 large-scale study of representation learning with the  
606 visual task adaptation benchmark. *arXiv preprint  
607 arXiv:1910.04867*, 2019. 5, 7
- 608 [30] Qingru Zhang, Minshuo Chen, Alexander Bukharin,  
609 Nikos Karampatziakis, Pengcheng He, Yu Cheng,  
610 Weizhu Chen, and Tuo Zhao. Adalora: Adaptive bud-  
611 get allocation for parameter-efficient fine-tuning. In  
612 *Proceedings of the ICLR, 2023*. 3
- 613 [31] Ruiyi Zhang, Rushi Qiang, Sai Ashish Somayajula,  
614 and Pengtao Xie. Autolora: Automatically tuning ma-  
615 trix ranks in low-rank adaptation based on meta learn-  
616 ing. In *Proceedings of the ACL, 2024*. 1, 3, 4, 5, 7
- 617 [32] Yuanhan Zhang, Kaiyang Zhou, and Ziwei Liu. Neu-  
618 ral prompt search. *IEEE Transactions on Pattern  
619 Analysis and Machine Intelligence*, 2024. 3, 7
